# Supplementary material for: ALD based nanostructured zinc oxide coated antiviral silk fabric
Source: Royal Society of Chemistry journal article supplement (doi:10.1039/d2ra02653h), 2022-01-01
Supplement: d2ra02653h1.pdf [file d2ra02653h1.pdf]

## Supporting Information: ALD based Nanostructured Zinc Oxide coated Antiviral Silk Fabric

Udit Kumar<sup>1,2</sup>, Candace R. Fox<sup>3</sup>, Corbin Feit<sup>2</sup>, Elayaraja Kolanthai<sup>1,2</sup>, Jeremy Sheiber<sup>3</sup>, Yifei Fu<sup>1,2</sup>, Sushant Singh<sup>4</sup>, Parag Banerjee<sup>2,5,6,7</sup>, Griffith D. Parks<sup>2</sup>, Sudipta Seal<sup>1,2,5,8\*</sup>

<sup>1</sup>Advanced Materials Processing and Analysis Center, Department of Materials Science and Engineering, University of Central Florida, Orlando, FL, 32816, United States of America.

<sup>2</sup>Department of Materials Science and Engineering, University of Central Florida, Orlando, FL, 32816, United States of America.

<sup>3</sup>Burnett School of Biomedical Sciences, College of Medicine, University of Central Florida, Orlando, FL, 32827, United States of America.

<sup>4</sup>Amity Institute of Biotechnology, Raipur-493225, C.G, India

<sup>5</sup>NanoScience Technology Center (NSTC), University of Central Florida, Orlando, FL, 32816, United States of America.

<sup>6</sup>Renewable Energy and Chemical Transformation (REACT) Faculty Cluster, University of Central Florida, Orlando, FL

<sup>7</sup>Florida Solar Energy Center (FSEC), University of Central Florida, Orlando, FL

<sup>8</sup>Bionix Cluster, College of Medicine, University of Central Florida, Orlando, FL, 32816, United States of America.

\*Corresponding author: [Sudipta.seal@ucf.edu](mailto:Sudipta.seal@ucf.edu); Engineering 1 Rm 207, 12800 Pegasus Dr, Orlando, FL 32816, USA

### S1. Ellipsometry

Sample: POST 200 cy ZnO at 100C on Si-native

|                                                                       |                                                                                                                                                                                                                                                                                                                                                                                                                                                                                                                                                                                                                                                                                                                                                                                                             |
|-----------------------------------------------------------------------|-------------------------------------------------------------------------------------------------------------------------------------------------------------------------------------------------------------------------------------------------------------------------------------------------------------------------------------------------------------------------------------------------------------------------------------------------------------------------------------------------------------------------------------------------------------------------------------------------------------------------------------------------------------------------------------------------------------------------------------------------------------------------------------------------------------|
| <b>Fit Results</b><br>MSE = 4.043<br>ZnO Thickness = 45.30 ± 0.006 nm | <b>Optical Model</b><br>- Layer # 2 = ZnO (GenOsc) Thickness # 2 = 45.30 nm (fit)<br><a href="#">Show Dialog</a><br>- e1 Components<br>Einf = 1.826<br>UV Pole Amp. = 40.2335 UV Pole En. = 6.750<br>IR Pole Amp. = 0.2271<br>- e2 Components<br>Oscillator Menu: <a href="#">Add</a> <a href="#">Delete</a> <a href="#">Delete All</a> <a href="#">Sort</a><br>Fit Menu: <a href="#">All</a> <a href="#">None</a> <a href="#">Amp.</a> <a href="#">Br.</a> <a href="#">En.</a><br>1: Type = PSemi-M0 Amp1 = 4.154 Br1 = 0.0897<br>Eo1 = 3.324 WR1 = 1.7753 PR1 = 0.938<br>AR1 = 0.437 O2R1 = 0.645<br>2: Type = Gaussian Amp2 = 1.580523 Br2 = 1.8737 En2 = 4.961<br>3: Type = Gaussian Amp3 = 1.900752 Br3 = 4.3791E-05 En3 = 3.374<br>Layer # 1 = INTR_JAW Thickness # 1 = 1.57 nm<br>Substrate = SI_JAW |
|-----------------------------------------------------------------------|-------------------------------------------------------------------------------------------------------------------------------------------------------------------------------------------------------------------------------------------------------------------------------------------------------------------------------------------------------------------------------------------------------------------------------------------------------------------------------------------------------------------------------------------------------------------------------------------------------------------------------------------------------------------------------------------------------------------------------------------------------------------------------------------------------------|

# Experimental and Model Generated Data Fits

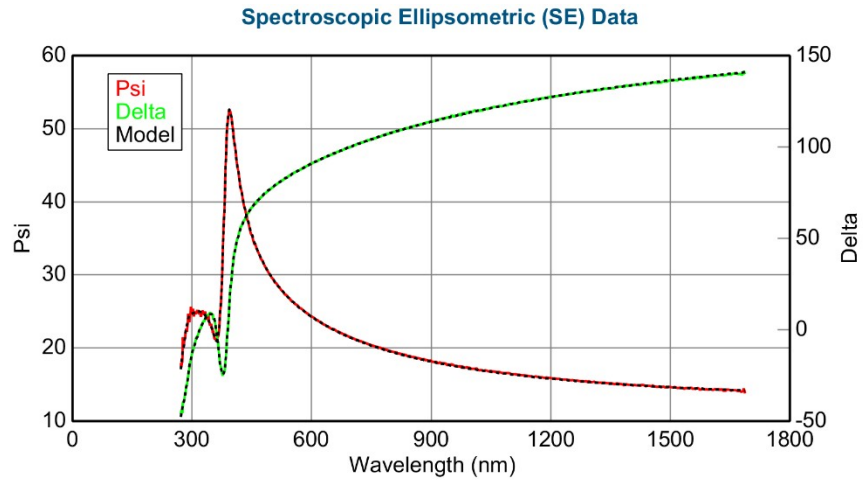

**Sample: in situ 50 cy ZnO at 100C on Si-native**

|                                                                                                                 |                                                                                                                                                                                                                                                                                                                                                                                                                                                                                                                                                                                                                                                                                                                                                                                                                                                                                                                                                                                                                                                                                                                                                                                                                              |
|-----------------------------------------------------------------------------------------------------------------|------------------------------------------------------------------------------------------------------------------------------------------------------------------------------------------------------------------------------------------------------------------------------------------------------------------------------------------------------------------------------------------------------------------------------------------------------------------------------------------------------------------------------------------------------------------------------------------------------------------------------------------------------------------------------------------------------------------------------------------------------------------------------------------------------------------------------------------------------------------------------------------------------------------------------------------------------------------------------------------------------------------------------------------------------------------------------------------------------------------------------------------------------------------------------------------------------------------------------|
| <b>Fit Results</b><br>MSE = 9.102<br>Thickness # 2 = $8.34 \pm 0.025$ nm<br>ZnO Thickness = $8.34 \pm 0.025$ nm | <b>Optical Model</b><br>- Layer # 2 = <a href="#">ZnO (GenOsc)</a> Thickness # 2 = <a href="#">8.34 nm</a> (fit)<br><a href="#">Show Dialog</a><br>- e1 Components<br>Einf = <a href="#">1.923</a><br>UV Pole Amp. = <a href="#">39.4332</a> UV Pole En. = <a href="#">7.999</a><br>IR Pole Amp. = <a href="#">0.4196</a><br>- e2 Components<br>Oscillator Menu: <a href="#">Add</a> <a href="#">Delete</a> <a href="#">Delete All</a> <a href="#">Sort</a><br>Fit Menu: <a href="#">All</a> <a href="#">None</a> <a href="#">Amp.</a> <a href="#">Br.</a> <a href="#">En.</a><br>1: Type = <a href="#">PSemi-M0</a> Amp1 = <a href="#">3.857</a> Br1 = <a href="#">0.1561</a><br>Eo1 = <a href="#">3.521</a> WR1 = <a href="#">2.0746</a> PR1 = <a href="#">0.785</a><br>AR1 = <a href="#">0.331</a> O2R1 = <a href="#">-0.00040140</a><br>2: Type = <a href="#">Gaussian</a> Amp2 = <a href="#">2.631504</a> Br2 = <a href="#">2.6711</a> En2 = <a href="#">6.559</a><br>3: Type = <a href="#">Gaussian</a> Amp3 = <a href="#">0.388221</a> Br3 = <a href="#">0.7921</a> En3 = <a href="#">0.220</a><br>Layer # 1 = <a href="#">INTR_JAW</a> Thickness # 1 = <a href="#">1.70 nm</a><br>Substrate = <a href="#">SI_JAW</a> |
|-----------------------------------------------------------------------------------------------------------------|------------------------------------------------------------------------------------------------------------------------------------------------------------------------------------------------------------------------------------------------------------------------------------------------------------------------------------------------------------------------------------------------------------------------------------------------------------------------------------------------------------------------------------------------------------------------------------------------------------------------------------------------------------------------------------------------------------------------------------------------------------------------------------------------------------------------------------------------------------------------------------------------------------------------------------------------------------------------------------------------------------------------------------------------------------------------------------------------------------------------------------------------------------------------------------------------------------------------------|

**Experimental and Model Generated Data Fits**

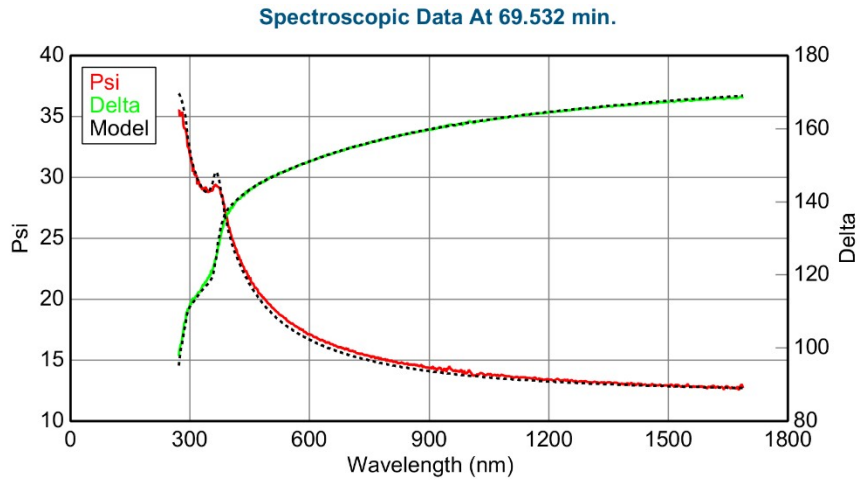

**Sample: in situ 15 cy ZnO at 100C on Si-native**

|                                                                                                                                                                                                     |                                                                                                                                                                                                                                                                                                                                                                                                                                                                                                                                                                                                                                                                                                                                                                                                                                                                                                                                                                                                                                                                                                                                                                                                                                                                                                                                                                                                                                                                                                                                                                                                                                                                                       |
|-----------------------------------------------------------------------------------------------------------------------------------------------------------------------------------------------------|---------------------------------------------------------------------------------------------------------------------------------------------------------------------------------------------------------------------------------------------------------------------------------------------------------------------------------------------------------------------------------------------------------------------------------------------------------------------------------------------------------------------------------------------------------------------------------------------------------------------------------------------------------------------------------------------------------------------------------------------------------------------------------------------------------------------------------------------------------------------------------------------------------------------------------------------------------------------------------------------------------------------------------------------------------------------------------------------------------------------------------------------------------------------------------------------------------------------------------------------------------------------------------------------------------------------------------------------------------------------------------------------------------------------------------------------------------------------------------------------------------------------------------------------------------------------------------------------------------------------------------------------------------------------------------------|
| <p><b>Fit Results</b><br/>                 MSE = 5.265<br/>                 Thickness # 2 = <math>0.01 \pm 0.014</math> nm<br/>                 Angle Offset = <math>0.0847 \pm 0.007324</math></p> | <p><b>Optical Model</b></p> <ul style="list-style-type: none"> <li>- Layer # 2 = <a href="#">ZnO (GenOsc)</a> Thickness # 2 = <a href="#">2.42 nm</a> (fit)                             <ul style="list-style-type: none"> <li><a href="#">Show Dialog</a></li> <li>- e1 Components                                     <ul style="list-style-type: none"> <li>Einf = <a href="#">1.923</a></li> <li>UV Pole Amp. = <a href="#">39.4332</a> UV Pole En. = <a href="#">7.999</a></li> <li>IR Pole Amp. = <a href="#">0.4196</a></li> </ul> </li> <li>- e2 Components                                     <ul style="list-style-type: none"> <li>Oscillator Menu: <a href="#">Add</a> <a href="#">Delete</a> <a href="#">Delete All</a> <a href="#">Sort</a></li> <li>Fit Menu: <a href="#">All</a> <a href="#">None</a> <a href="#">Amp.</a> <a href="#">Br.</a> <a href="#">En.</a></li> <li>1: Type = <a href="#">PSemi-M0</a> Amp1 = <a href="#">3.857</a> Br1 = <a href="#">0.1561</a><br/>                                         Eo1 = <a href="#">3.521</a> WR1 = <a href="#">2.0746</a> PR1 = <a href="#">0.785</a><br/>                                         AR1 = <a href="#">0.331</a> O2R1 = <a href="#">-0.00040140</a></li> <li>2: Type = <a href="#">Gaussian</a> Amp2 = <a href="#">2.631504</a> Br2 = <a href="#">2.6711</a> En2 = <a href="#">6.559</a></li> <li>3: Type = <a href="#">Gaussian</a> Amp3 = <a href="#">0.388221</a> Br3 = <a href="#">0.7921</a> En3 = <a href="#">0.220</a></li> </ul> </li> </ul> </li> <li>Layer # 1 = <a href="#">NTVE_JAW</a> Native Oxide = <a href="#">1.71 nm</a></li> <li>Substrate = <a href="#">SI_JAW</a></li> </ul> |
|-----------------------------------------------------------------------------------------------------------------------------------------------------------------------------------------------------|---------------------------------------------------------------------------------------------------------------------------------------------------------------------------------------------------------------------------------------------------------------------------------------------------------------------------------------------------------------------------------------------------------------------------------------------------------------------------------------------------------------------------------------------------------------------------------------------------------------------------------------------------------------------------------------------------------------------------------------------------------------------------------------------------------------------------------------------------------------------------------------------------------------------------------------------------------------------------------------------------------------------------------------------------------------------------------------------------------------------------------------------------------------------------------------------------------------------------------------------------------------------------------------------------------------------------------------------------------------------------------------------------------------------------------------------------------------------------------------------------------------------------------------------------------------------------------------------------------------------------------------------------------------------------------------|

**Experimental and Model Generated Data Fits**

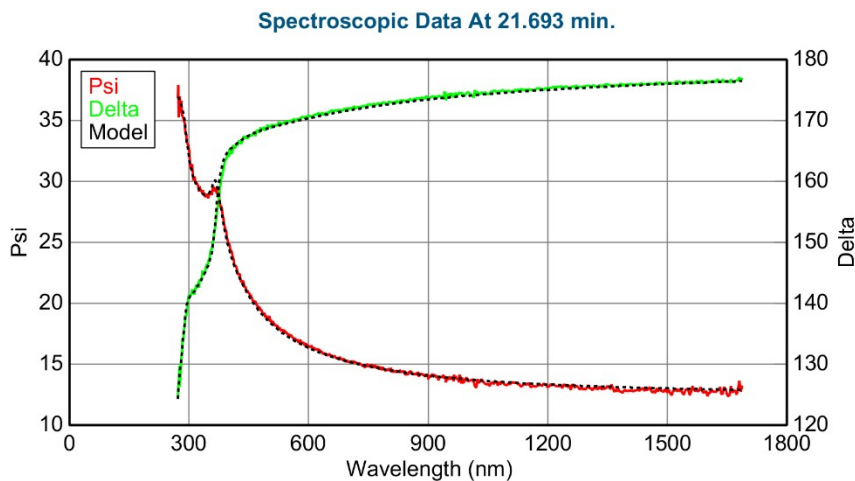

**S2. XPS (X-ray photoelectron spectroscopy)**

| Sample Details | Peak Positions (eV) |         |         |         | Peak shift (eV) |
|----------------|---------------------|---------|---------|---------|-----------------|
|                | C-C/C-H             | C-N     | C-O     | C=O     |                 |
| Control silk   | 282.976             | 283.634 | 284.6   | 286.4   | 1.624           |
| 15 Cycle       | 283.048             | 283.691 | 284.59  | 286.41  | 1.552           |
| 50 Cycle       | 283.07              | 283.413 | 284.548 | 286.454 | 1.53            |
| 200 Cycle      | 283.17              | 284.077 | 284.9   | 286.519 | 1.43            |

| Sample Details | Peak Positions |         |         |         |
|----------------|----------------|---------|---------|---------|
|                | C-C/C-H        | C-N     | C-O     | C=O     |
| Control silk   | 284.6          | 285.258 | 286.224 | 288.024 |
| 15 Cycle       | 284.6          | 285.243 | 286.142 | 287.962 |
| 50 Cycle       | 284.6          | 284.943 | 286.078 | 287.984 |
| 200 Cycle      | 284.6          | 285.507 | 286.33  | 287.949 |
